# Supplementary material
Source: HighWire-hosted journal article supplement (https://www.highwirestage.com/highwire/filestream/52385/field_highwire_adjunct_files/0/3598_appendix.pdf)
Supplement: 3598_appendix.pdf [file 3598_appendix.pdf]

## REFERENCES

- Byrne JV, Sohn MJ, Molyneux AJ, et al. Five-year experience in using coil embolization for ruptured intracranial aneurysms: outcomes and incidence of late rebleeding. *J Neurosurg* 1999;90:656–63
- Lempert TE, Malek AM, Halbach W, et al. Endovascular treatment of ruptured posterior circulation cerebral aneurysms: clinical and angiographic outcomes. *Stroke* 2000;31:100–10
- Bracard S, Lebedinsky A, Anxionnat R, et al. Endovascular treatment of Hunt and Hess grade IV and V aneurysms. *AJNR Am J Neuroradiol* 2002;23:953–57
- Tamatani S, Ito Y, Abe H, et al. Evaluation of the stability of aneurysms after embolization using detachable coils: correlation between stability of aneurysms and embolized volume of aneurysms. *AJNR Am J Neuroradiol* 2002;23:762–67
- Thornton J, Debrun GM, Aletich VA, et al. Follow-up angiography of intracranial aneurysms treated with endovascular placement of Guglielmi detachable coils. *Neurosurgery* 2002;50:239–49, discussion 249–50
- Groden C, Eckert B, Ries T, et al. Angiographic follow-up of vertebral artery aneurysms treated with detachable coils. *Neuroradiology* 2003;45:435–40
- Murayama Y, Nien YL, Duckwiler G, et al. Guglielmi detachable coil embolization of cerebral aneurysms: 11 years' experience. *J Neurosurg* 2003;98:959–66
- Raymond J, Guilbert F, Weill A, et al. Long-term angiographic recurrences after selective endovascular treatment of aneurysms with detachable coils. *Stroke* 2003;34:1398–403
- Sluzewski M, van Rooij WJ, Rinkel GJ, et al. Endovascular treatment of ruptured intracranial aneurysms with detachable coils: long-term clinical and serial angiographic results. *Radiology* 2003;227:720–24
- Vallee JN, Aymard A, Vicaut E, et al. Endovascular treatment of basilar tip aneurysms with Guglielmi detachable coils: predictors of immediate and long-term results with multivariate analysis 6-year experience. *Radiology* 2003;226:867–79
- Yu SC, Chan MS, Boet R, et al. Intracranial aneurysms treated with Guglielmi detachable coils: midterm clinical and radiological outcome in 97 consecutive Chinese patients in Hong Kong. *AJNR Am J Neuroradiol* 2004;25:307–13
- Kai Y, Hamada J, Morioka M, et al. Evaluation of the stability of small ruptured aneurysms with a small neck after embolization with Guglielmi detachable coils: correlation between coil packing ratio and coil compaction. *Neurosurgery* 2005;56:785–92, discussion 785–92
- Murphy M, Bell D, Worth RD, et al. Angiography postclipping and coiling of cerebral aneurysms. *Br J Neurosurg* 2005;19:225–28
- Gallas S, Pasco A, Cottier JP, et al. A multicenter study of 705 ruptured intracranial aneurysms treated with Guglielmi detachable coils. *AJNR Am J Neuroradiol* 2005;26:1723–31
- Linfante I, Akkawi NM, Perlow A, et al. Polyglycolide/polylactide-coated platinum coils for patients with ruptured and unruptured cerebral aneurysms: a single-center experience. *Stroke* 2005;36:1948–53
- Iijima A, Piotin M, Mounayer C, et al. Endovascular treatment with coils of 149 middle cerebral artery berry aneurysms. *Radiology* 2005;237:611–19
- Yagi K, Satoh K, Satomi J, et al. Evaluation of aneurysm stability after endovascular embolization with Guglielmi detachable coils: correlation between long-term stability and volume embolization ratio. *Neurol Med Chir (Tokyo)* 2005;45:56–65, discussion 565–66
- Slob MJ, van Rooij WJ, Sluzewski M. Influence of coil thickness on packing, re-opening and retreatment of intracranial aneurysms: a comparative study between two types of coils. *Neurol Res* 2005;27(suppl 1):S116–19
- Fiorella D, Albuquerque FC, McDougall CG. Durability of aneurysm embolization with Matrix detachable coils. *Neurosurgery* 2006;58:51–59, discussion 51–59
- Gauvrit JY, Leclerc X, Caron S, et al. Intracranial aneurysms treated with Guglielmi detachable coils: imaging follow-up with contrast-enhanced MR angiography. *Stroke* 2006;37:1033–37
- Gaba RC, Ansari SA, Roy SS, et al. Embolization of intracranial aneurysms with hydrogel-coated coils versus inert platinum coils: effects on packing density, coil length and quantity, procedure performance, cost, length of hospital stay, and durability of therapy. *Stroke* 2006;37:1443–50
- Murayama Y, Viñuela F, Ishii A, et al. Initial clinical experience with Matrix detachable coils for the treatment of intracranial aneurysms. *J Neurosurg* 2006;105:192–99
- Berenstein A, Song JK, Niimi Y, et al. Treatment of cerebral aneurysms with hydrogel-coated platinum coils (HydroCoil): early single-center experience. *AJNR Am J Neuroradiol* 2006;27:1834–40
- Grunwald IQ, Papanagiotou P, Struffert T, et al. Recanalization after endovascular treatment of intracerebral aneurysms. *Neuroradiology* 2007;49:41–47
- Mitra D, Herwadkar A, Soh C, et al. Follow-up of intracranial aneurysms treated with Matrix detachable coils: a single-center experience. *AJNR Am J Neuroradiol* 2007;28:362–67
- Deshaies EM, Adamo MA, Boulous AS. A prospective single-center analysis of the safety and efficacy of the HydroCoil embolization system for the treatment of intracranial aneurysms. *J Neurosurg* 2007;106:226–33
- Fanning NF, Berentei Z, Brennan PR, et al. HydroCoil as an adjunct to bare platinum coil treatment of 100 cerebral aneurysms. *Neuroradiology* 2007;49:139–48
- Pandey AS, Koebbe C, Rosenwasser RH, et al. Endovascular coil embolization of ruptured and unruptured posterior circulation aneurysms: review of a 10-year experience. *Neurosurgery* 2007;60:626–36, discussion 636–37
- Nguyen TN, Hoh BL, Amin-Hanjani S, et al. Comparison of ruptured vs unruptured aneurysms in recanalization after coil embolization. *Surg Neurol* 2007;68:19–23
- Kang HS, Han MH, Lee TH, et al. Embolization of intracranial aneurysms with hydrogel-coated coils: result of a Korean multicenter trial. *Neurosurgery* 2007;61:51–58, discussion 58–59
- Bendszus M, Bartsch AJ, Solymosi L. Endovascular occlusion of aneurysms using a new bioactive coil: a matched pair analysis with bare platinum coils. *Stroke* 2007;38:2855–57
- Ries T, Siemonsen S, Thomalla G, et al. Long-term follow-up of cerebral aneurysms after endovascular therapy prediction and outcome of retreatment. *AJNR Am J Neuroradiol* 2007;28:1755–61
- Cloft H, for the HEAL Investigators. HydroCoil for Endovascular Aneurysm Occlusion (HEAL) study: 3–6 month angiographic follow-up results. *AJNR Am J Neuroradiol* 2007;28:152–54
- Butteriss D, Gholkar A, Mitra D, et al. Single-center experience of Cerecyte coils in the treatment of intracranial aneurysms: initial experience and early follow-up results. *AJNR Am J Neuroradiol* 2008;29:53–56
- Pierot L, Leclerc X, Bonafé A, et al. Endovascular treatment of intracranial aneurysms with Matrix detachable coils: midterm anatomic follow-up from a prospective multicenter registry. *AJNR Am J Neuroradiol* 2008;29:57–61
- Gallas S, Drouineau J, Gabrillargues J, et al. Feasibility, procedural morbidity and mortality, and long-term follow-up of endovascular treatment of 321 unruptured aneurysms. *AJNR Am J Neuroradiol* 2008;29:63–68
- Standhardt H, Boecher-Schwarz H, Gruber A, et al. Endovascular treatment of unruptured intracranial aneurysms with Guglielmi detachable coils: short- and long-term results of a single-center series. *Stroke* 2008;39:899–904
- Natarajan SK, Sekhar LN, Ghodke B, et al. Outcomes of ruptured intracranial aneurysms treated by microsurgical clipping and endovascular coiling in a high-volume center. *AJNR Am J Neuroradiol* 2008;29:753–59
- Veznedaroglu E, Koebbe CJ, Siddiqui A, et al. Initial experience with bioactive Cerecyte detachable coils: impact on reducing recurrence rates. *Neurosurgery* 2008;62:799–805, discussion 805–06

40. Geyik S, Yavuz K, Ergun O, et al. Endovascular treatment of intracranial aneurysms with bioactive Cerecyte coils: effects on treatment stability. *Neuroradiology* 2008;50:787–93
41. Le Feuvre DE, Taylor AG. Endovascular cerebral aneurysm treatment: long-term outcomes. *S Afr Med J* 2008;98:954–57
42. Ishii A, Murayama Y, Nien YL, et al. Immediate and midterm outcomes of patients with cerebral aneurysms treated with Matrix1 and Matrix2 coils: a comparative analysis based on a single-center experience in 250 consecutive cases. *Neurosurgery* 2008;63:1071–77, discussion 1077–79
43. Crocker M, Corns R, Hampton T, et al. Vascular neurosurgery following the International Subarachnoid Aneurysm Trial: modern practice reflected by subspecialization. *J Neurosurg* 2008;109:992–97
44. Xu N, Wang H, Luo Q. Endovascular treatment of intracranial wide-necked aneurysms with GDCs combined with balloon or stent. *The Neuroradiology Journal* 2009;22:86–91
45. Jin SC, Kwon do H, Ahn JS, et al. Clinical and radiological outcomes of endovascular detachable coil embolization in paraclinoid aneurysms: a 10-year experience. *J Korean Neurosurg Soc* 2009;45:5–10
46. Oishi H, Yoshida K, Shimizu T, et al. Endovascular treatment with bare platinum coils for middle cerebral artery aneurysms. *Neurol Med Chir (Tokyo)* 2009;49:287–93
47. Hayashi K, Kitagawa N, Morikawa M, et al. Long-term follow-up of endovascular coil embolization for cerebral aneurysms using three-dimensional time-of-flight magnetic resonance angiography. *Neurol Res* 2009;31:674–80
48. Vendrell JF, Menjot N, Costalat V, et al. Endovascular treatment of 174 middle cerebral artery aneurysms: clinical outcome and radiologic results at long-term follow-up. *Radiology* 2009;253:191–98
49. Gunnarsson T, Tong FC, Klurfan P, et al. Angiographic and clinical outcomes in 200 consecutive patients with cerebral aneurysm treated with hydrogel-coated coils. *AJNR Am J Neuroradiol* 2009;30:1657–64
50. Gallas S, Januel AC, Pasco A, et al. Long-term follow-up of 1036 cerebral aneurysms treated by bare coils: a multicentric cohort treated between 1998 and 2003. *AJNR Am J Neuroradiol* 2009;30:1986–92
51. Ferré JC, Carsin-Nicol B, Morandi X, et al. Time-of-flight MR angiography at 3T versus digital subtraction angiography in the imaging follow-up of 51 intracranial aneurysms treated with coils. *Eur J Radiol* 2009;72:365–69
52. Zhou B, Li MH, Wang W, et al. Three-dimensional volume-rendering technique in the angiographic follow-up of intracranial aneurysms embolized with coils. *J Neurosurg* 2010;112:674–80
53. Zhang J, Lv M, Lv X, et al. Endovascular treatment for cerebral aneurysms using stents. *The Neuroradiology Journal* 2010;23:730–36
54. Fiorella D, Albuquerque FC, Woo H, et al. Neuroform stent assisted aneurysm treatment: evolving treatment strategies, complications and results of long term follow-up. *J Neurointerv Surg* 2010;2:16–22
55. Bracard S, Abdel-Kerim A, Thuillier L, et al. Endovascular coil occlusion of 152 middle cerebral artery aneurysms: initial and midterm angiographic and clinical results. *J Neurosurg* 2010;112:703–08
56. Shankar JJ, Lum C, Parikh N, et al. Long-term prospective follow-up of intracranial aneurysms treated with endovascular coiling using contrast-enhanced MR angiography. *AJNR Am J Neuroradiol* 2010;31:1211–15
57. Liang G, Gao X, Li Z, et al. Neuroform stent-assisted coiling of intracranial aneurysms: a 5-year single-center experience and follow-up. *Neurol Res* 2010;32:721–27
58. Byrne JV, Beltechi R, Yarnold JA, et al. Early experience in the treatment of intra-cranial aneurysms by endovascular flow diversion: a multicentre prospective study. *PLoS One* 2010;5:Pii: e12492
59. Abud DG, Nakiri GS, Abud TG, et al. Endovascular therapy for selected (most non-surgical) intracranial aneurysms in a Brazilian University Hospital. *Arg Neuropsychiatr* 2010;68:76–69
60. Songsaeng D, Geibprasert S, Willinsky R, et al. Impact of anatomical variations of the circle of Willis on the incidence of aneurysms and their recurrence rate following endovascular treatment. *Clin Radiol* 2010;65:895–901
61. Gao X, Liang G, Li Y, et al. Neuroform stent-assisted coiling of large and giant intracranial aneurysms: angiographic and clinical outcomes in 71 consecutive patients. *Neurol India* 2010;58:825–32
62. Pyysalo LM, Keski-Nisula LH, Niskakangas TT, et al. Long-term follow-up study of endovascularly treated intracranial aneurysms. *Interv Neuroradiol* 2010;16:231–39
63. Murphy E, Pryor J. Micrus bare platinum versus Cerecyte coils in the treatment of intracranial aneurysms: a single center, single physician experience including long term follow-up results. *J Neurointerv Surg* 2010;2:A37–38
64. Afshani M, Hoit D, Morris S, et al. Enterprise stent assisted coil embolization of cerebral aneurysms. *J Neurointerv Surg* 2010;2:A3
65. Lukić S, Mijailović M, Marković Z, et al. Embolization of ruptured intracranial aneurysms with detachable coils: case series. *Jpn J Radiol* 2011;29:92–97
66. Klompshouwer EG, Dings JT, van Oostenbrugge RJ, et al. Single-center experience of surgical and endovascular treatment of ruptured intracranial aneurysms. *AJNR Am J Neuroradiol* 2011;32:570–75
67. Plowman RS, Clarke A, Clarke M, et al. Sixteen-year single-surgeon experience with coil embolization for ruptured intracranial aneurysms: recurrence rates and incidence of late rebleeding: clinical article. *J Neurosurg* 2011;114:863–74
68. Cherian MP, Pranesh MB, Mehta P, et al. Outcomes of endovascular coiling of anterior communicating artery aneurysms in the early post-rupture period: a prospective analysis. *Neurol India* 2011;59:218–23
69. Cekirge HS, Yavuz K, Geyik S, et al. HyperForm balloon remodeling in the endovascular treatment of anterior cerebral, middle cerebral, and anterior communicating artery aneurysms: clinical and angiographic follow-up results in 800 consecutive patients. *J Neurosurg* 2011;114:944–53
70. Ferns SP, Sprengers ME, van Rooij WJ, et al. Late reopening of adequately coiled intracranial aneurysms: frequency and risk factors in 400 patients with 440 aneurysms. *Stroke* 2011;42:1331–37
71. White PM, Lewis SC, Gholkar A, et al. Hydrogel-coated coils versus bare platinum coils for the endovascular treatment of intracranial aneurysms (HELPS): a randomized controlled trial. *Lancet* 2011;377:1655–62
72. Zang P, Liang C, Shi Q, et al. Intraprocedural cerebral aneurysm rupture during endovascular coiling. *Neurol India* 2011;59:369–72
73. Guo XB, Fan YM, Zhang JN. HydroSoft coil versus HydroCoil for endovascular aneurysm occlusion study: a single center experience. *Eur J Radiol* 2011;79:e42–46
74. Izar B, Rai A, Raghuram K, et al. Comparison of devices used for stent-assisted coiling of intracranial aneurysms. *PLoS One* 2011;6:e24875
75. Mocco J, Fargen KM, Albuquerque FC, et al. Delayed thrombosis or stenosis following Enterprise-assisted stent-coiling: is it safe? Midterm results of the interstate collaboration of Enterprise stent coiling. *Neurosurgery* 2011;69:908–13, discussion 913–14
76. Park JH, Kang HS, Han MH, et al. Embolization of intracranial aneurysms with HydroSoft coils: results of the Korean multicenter study. *AJNR Am J Neuroradiol* 2011;32:1756–61
77. He XH, Li WT, Peng WJ, et al. Management of recurrent intracranial aneurysms with coiling and stent. *Neurosurgery Quarterly* 2011;21:11–16
78. Tso MK, Kochar P, Goyal M, et al. Long-term angiographic and clinical outcomes in completely versus incompletely coiled ruptured intracranial aneurysms. *Clin Neurosurg* 2011;58:143–48

79. Tang W, Feng H, Chen Z, et al. **Endovascular embolization for intracranial aneurysms: report of 162 cases.** *Acta Neurochir Suppl* 2011;110(pt 2):123–25
80. Claiborne Johnson S, McDougal C, Gholkar A. **The MAPS (Matrix and Platinum Science) Trial: primary results.** In: *Proceedings of the Eighth Annual Meeting of the Society of Neurointerventional Surgery*, Colorado Springs, Colorado. July 25–28, 2011
81. Molyneux AJ, Fox A, Sneade M, et al. **cerecyte coil Trial: angiographic and clinical outcomes of endovascular coiling in patients with ruptured and unruptured intracranial aneurysms treated with Cerecyte coils compared with bare platinum coils—final results of a prospective randomized trial.** In: *Proceedings of the American Society of Neuroradiology 50th Annual Meeting & the Foundation of the ASNR Symposium*, New York. April 21–26, 2012
82. Pierot L, Cognard C, Ricolfi F, et al. **Mid-term anatomic results after endovascular treatment of ruptured intracranial aneurysms with Guglielmi detachable coils and Matrix coils: analysis of the CLARITY series.** *AJNR Am J Neuroradiol* 2012;33:469–73
